# Supplementary material
Source: PubMed Central journal article supplement (PMC6030721)
Supplement: supp_RA118.000623_135392_1_supp_115455_p6xf8x.pdf [file supp_RA118.000623_135392_1_supp_115455_p6xf8x.pdf]

## Supplementary data

**Figure S1.** (A) Depletion of endogenous nuclear transport receptors. Isotopically labeled (“light” (l), “medium” (m), “heavy” (h)) HeLa cell extracts were left untreated (uncleared) or incubated with phenyl-Sepharose for selective depletion of endogenous nuclear transport receptors and with the HZZ-tag immobilized on IgG-Sepharose to remove proteins binding unspecifically to the affinity matrix (cleared). Cleared and uncleared lysates were separated by SDS-PAGE, followed by immunoblotting for importin 13, importin  $\beta$ , transportin, Ran and eIF1A. Note that on the blot probed with the anti-eIF1A antibody, the band below 25 kDa results from a previous incubation of the blot with another antibody. (B, C) Importin 13 binds endogenous eIF1A (B) and Ubc9 (C) from a HeLa cytosolic extract. HZZ-tagged importin 13 was immobilized on IgG-Sepharose and incubated with cytosolic cell extracts in the absence or presence of 10  $\mu$ M (B) or 0.6  $\mu$ M (C) RanQ69L or 5  $\mu$ M Ubc9 (B), as indicated. Bound proteins were analyzed by SDS-PAGE, followed by immunoblotting with anti-eIF1A (B) or anti-Ubc9 (C) antibodies. The input corresponds to 1% of the starting material.

**Figure S2.** Venn diagrams. (A) Overlap of importin 13 cargo candidates from SILAC 2-4 (proteins reduced by Ubc9 or enriched by Ran) and SILAC 1 (proteins binding to importin 13 but not the HZZ-matrix). (B) Comparison of importin 13 cargo candidates identified in this study (SILAC 2-4) and previous studies (29, 30). 2nd and 3rd Z-score candidates from Kimura et al. and proteins enriched with an adjusted Fisher P-value < 0.01 from Mackmull et al. were used for the analysis. (D) Comparison of putative importin 13 (this study, SILAC 2-4) and Crm1 cargoes (25, 26). Cargoes of the categories “A”, “B” and “low abundant” from Kirli et al. were used for the analysis.

**Figure S3.** Endogenous importin 13 and importin  $\beta$  concentrations in HeLa cells. 25,000, 50,000 or 100,000 HeLa cells and His-tagged importin 13 or importin  $\beta$  were analyzed by

SDS-PAGE, followed by immunoblotting with anti-importin 13 (A) or anti-importin  $\beta$  (B) antibodies. (C) Bar graph showing the mean endogenous importin 13 (~80 nM) and importin  $\beta$  (~1,700 nM) levels from three independent experiments. Bars, standard error of the mean.

**Figure S4.** Importin 13 has different binding modes for cargo proteins. As Fig. 8A with staining for DNA (DAPI) and FLAG-importin 13 included.

**Table S1.** Identification of importin 13 cargo candidates

**Table S2.** Peptide identification and quantification

**Table S3.** Overview Perseus evaluation of SILAC 1 proteome data

**Table S4.** Overview Perseus analysis of SILAC 2-4 proteome data
