# Supplementary material
Source: PubMed Central journal article supplement (PMC6030721)
Supplement: supp_RA118.000623_135392_1_supp_115459_p6xf8x.pdf [file supp_RA118.000623_135392_1_supp_115459_p6xf8x.pdf]

**Table S4. Overview Perseus analysis of SILAC 2-4 proteome data**

| <b>Matrix #</b> | <b>Processing</b>                       | <b>Description</b>                                                                                                                     |
|-----------------|-----------------------------------------|----------------------------------------------------------------------------------------------------------------------------------------|
| Matrix 1        | Generic matrix upload                   | Load MaxQuant derived proteomics data from the tab-separated file proteinGroups.txt                                                    |
| Matrix 2-4      | Filter rows based on categorical column | Remove proteins only identified by site<br>Remove hits that match against a reverse nonsense database<br>Remove potential contaminants |
| Matrix 5        | Remove empty columns                    | Remove empty columns                                                                                                                   |
| Matrix 6        | Select rows manually                    | Manual removal of immunoglobulin contaminants                                                                                          |
| Matrix 7        | Transform                               | Inverse ratios (1/x)                                                                                                                   |
| Matrix 8        | Matching rows by name                   | Combine columns of the existing protein ratios (Matrix 6) with the newly generated inverted ratios (Matrix 7)                          |
| Matrix 9        | Transform                               | Log transformation of expression columns ( $\log_2(x)$ )                                                                               |
| Matrix 10       | Categorical annotation rows             | Define columns with protein ratios as own group                                                                                        |
| Matrix 11       | Reorder/remove columns                  | Selection of ratio columns of interest                                                                                                 |
| Matrix 12-13    | Categorical annotation row              | Define protein ratios of biological replicates as a group                                                                              |
| Matrix 14       | Filter rows based on valid values       | Filter protein ratios to be $\geq 0.5$ for two of three replicates (add categorical row)                                               |
| Matrix 15       | Filter rows based on valid values       | Filter protein ratios to be $\geq 0.5$ for all three replicates (add categorical row)                                                  |
| Matrix 16       | One-sample test                         | Right-sided one-sample t-test using a threshold p-value of 0.05                                                                        |
| Matrix 17       | One-sample test                         | Right-sided one-sample t-test using a threshold p-value of 0.01                                                                        |
| Matrix 18       | Rename columns                          | Give expression columns a more explicit name                                                                                           |
| Matrix 19       | Fill categorical columns                | Fill empty field in categorical columns with '-' to allow for later combining of categorical columns                                   |
| Matrix 20-22    | Combine categorical columns             | Combine categorical columns of fold change filter and t-test                                                                           |
| Matrix 23-26    | Categorical annotation row              | Define protein ratios of label-switch experiments as a group ('forward' & 'reverse' reaction)                                          |
| Matrix 27-31    | Average groups                          | Calculate mean of each group                                                                                                           |
| Matrix 32       | Filter rows based on valid values       | Filter protein ratios to be $\geq 0.5$ for two of three replicates and reduce matrix for scatter plot generation                       |
